# Supplementary material for: Investigating the impact of inbuilt cold atmospheric pressure plasma on molecular assemblies of tryptophan enantiomers: in vitro fabrication of self-assembled supramolecular structures
Source: Royal Society of Chemistry journal article supplement (doi:10.1039/d3ra04086k), 2023-01-01
Supplement: d3ra04086k1.pdf [file d3ra04086k1.pdf]

## Supplementary Information

# Investigating the impact of an inbuilt Cold Atmospheric Pressure Plasma on molecular assemblies of Tryptophan enantiomers: *in vitro* fabrication of self-assembled supramolecular structures

Deepjyoti Basumatary<sup>ab</sup>, Heremba Bailung<sup>a</sup>, Sachin B. Jorvekar<sup>c</sup>, Roshan M Borkar<sup>c</sup>,  
Kamatchi Sankaranarayanan<sup>a\*</sup>

<sup>a</sup>Institute of Advanced Study in Science and Technology, (An Autonomous Institute under DST, Govt. of India), Vigyan Path, Paschim Boragaon, Garchuk, Guwahati 781035, Assam, India

<sup>b</sup>Academy of Scientific and Innovative Research (AcSIR), Campus Postal Staff College Area, Sector 19, Kamla Nehru Nagar, Ghaziabad 201002, Uttar Pradesh, India

<sup>c</sup>Department of Pharmaceutical Analysis, National Institute of Pharmaceutical Education and Research (NIPER), Sila Katamur (Halugurisuk), P.O.: Changsari, Dist: Kamrup, Assam 781101, India

\*Author for Correspondence

### **K. Sankaranarayanan**

Assistant Professor Biophysics - Physical Sciences Division, Institute of Advanced Study in Science and Technology, (An Autonomous Institute Under DST, Govt. of India), Vigyan Path, Paschim Boragaon, Garchuk, Guwahati 781035, Assam, India.

Email: [kamatchi.sankaran@gmail.com](mailto:kamatchi.sankaran@gmail.com)

**Table S1 – Particle size distribution of L-Trp**

| Treatment time (min) | pdi   | Size (r) (nm) |        | % intensity | Width (nm) | Z-average (r) (nm) |
|----------------------|-------|---------------|--------|-------------|------------|--------------------|
| L-Trp Control        | 1     | Peak 1        | 193    | 100         | 10.48      | 1181               |
|                      |       |               |        |             |            |                    |
| L-Trp 5              | 0.804 | Peak 1        | 359.4  | 100         | 60.83      | 725.9              |
|                      |       |               |        |             |            |                    |
| L-Trp 10             | 1     | Peak 1        | 295.7  | 98.3        | 187.2      | 578                |
|                      |       | Peak 2        | 0.6912 | 6.4         | 0.05066    |                    |
|                      |       | Peak 3        | 130.5  | 2.6         | 14.33      |                    |

**Table S2- Particle Size distribution of D-Trp**

| Treatment time (min) | pdi   | Size (r) (nm) |        | % intensity | Width (nm)               | Z-average (r) (nm) |
|----------------------|-------|---------------|--------|-------------|--------------------------|--------------------|
| D-Trp Control        | 1     | Peak 1        | 265.5  | 100         | 28.33                    | 710.8              |
|                      |       |               |        |             |                          |                    |
| D-Trp 5              | 0.739 | Peak 1        | 258    | 57          | 61.08                    | 565.3              |
|                      |       | Peak 2        | 892.6  | 26.8        | 208.1                    |                    |
|                      |       | Peak 3        | 2602   | 16.3        | 237.1                    |                    |
|                      |       |               |        |             |                          |                    |
| D-Trp 10             | 0.865 | Peak 1        | 164.2  | 90.4        | 21.54                    | 348.1              |
|                      |       | Peak 2        | 0.8678 | 9.6         | 1.054 x 10 <sup>-8</sup> |                    |

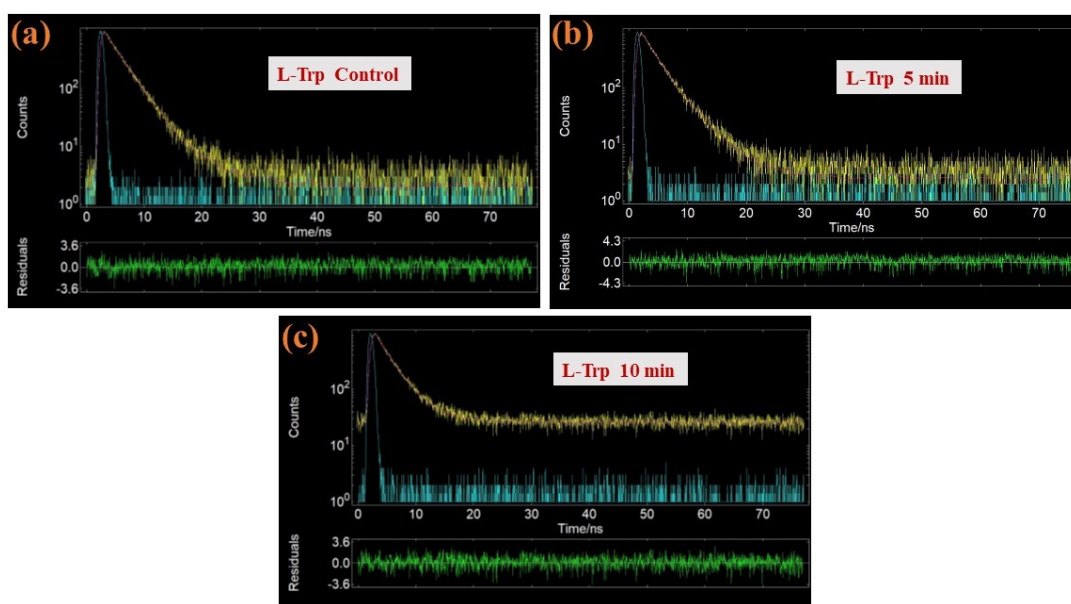

**Fig S1: Fitted time resolved spectra of (a) control, (b) 5 min and (c) 10 min CAPP treated L-Trp.**

**Table S3 - Lifetime of L-Trp at different time of plasma treatment**

| Treatment time (Min) | $\tau_1$ (ns)       | % population | $\tau_2$ (ns)       | % population |
|----------------------|---------------------|--------------|---------------------|--------------|
| 0                    | $2.7099 \pm 0.0407$ | 92.15        | $6.7070 \pm 0.9235$ | 7.85         |
| 5                    | $1.9865 \pm 0.1089$ | 50.93        | $3.8606 \pm 0.1719$ | 49.07        |
| 10                   | $2.2527 \pm 0.0819$ | 76.07        | $4.4263 \pm 0.7310$ | 23.93        |

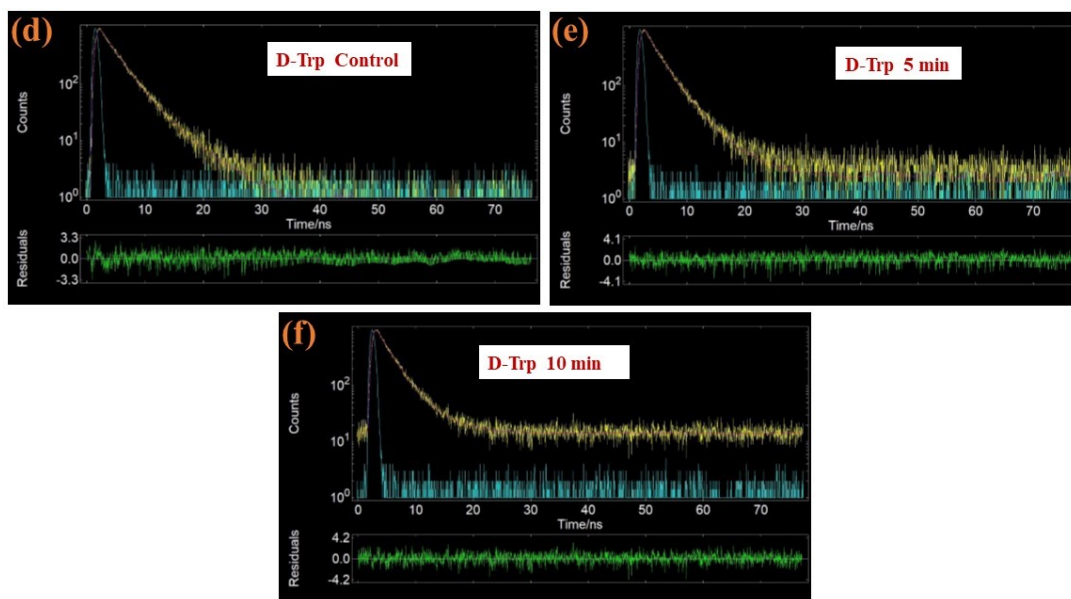

**Fig S2: Fitted time resolved spectra of (d) control, (e) 5 min and (f) 10 min and CAPP treated D-Trp.**

**Table S4 - Lifetime of D-Trp at different time of plasma treatment**

| Treatment Time (min) | $\tau_1$ (ns) | % population | $\tau_2$ (ns)  | % population |
|----------------------|---------------|--------------|----------------|--------------|
| 0                    | 2.5053±0.0589 | 74.19        | 5.4414±0.26696 | 25.81        |
| 5                    | 2.0604±0.0866 | 60.17        | 4.0973±0.2023  | 39.83        |
| 10                   | 2.0753±0.1217 | 61.78        | 3.9738±0.3358  | 38.22        |

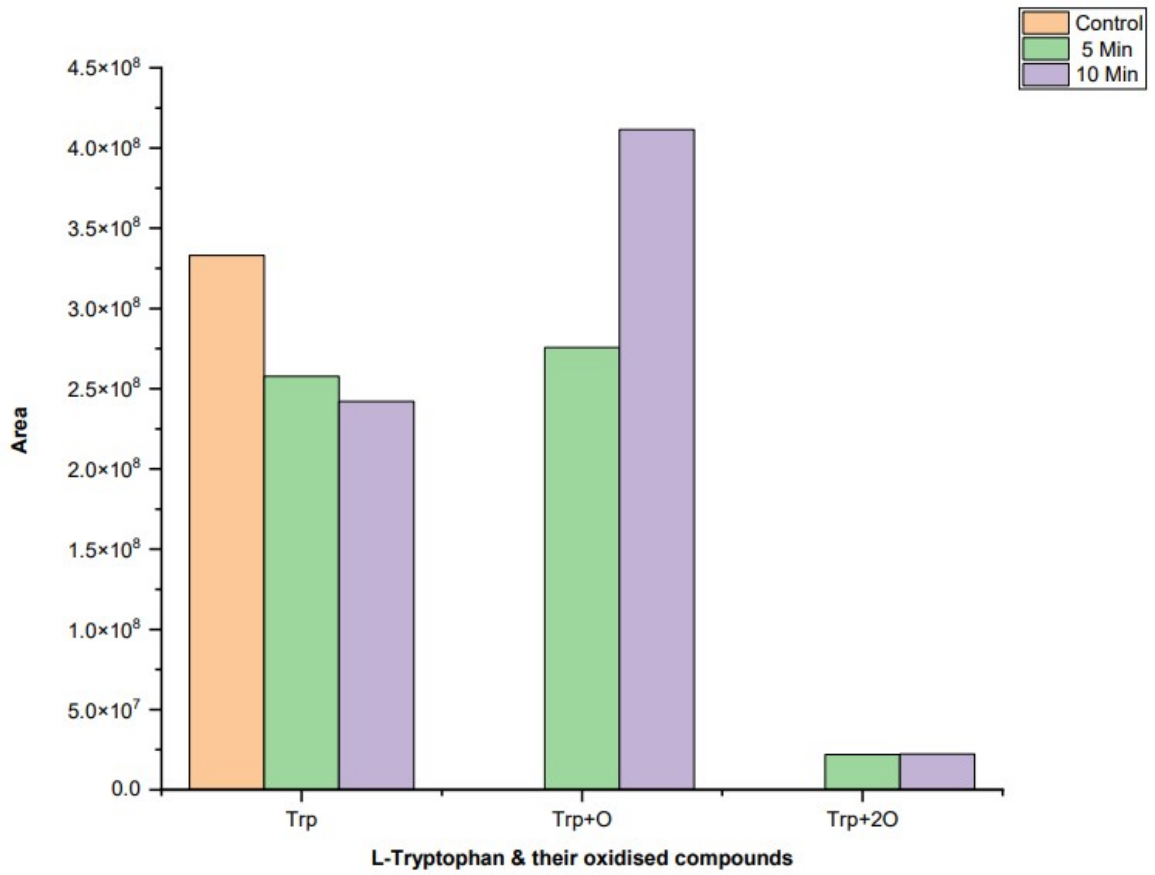

**Figure S3: Statistical representation of population of observed mass of L-Trp and its hydroxylated products after CAPP treatment.**

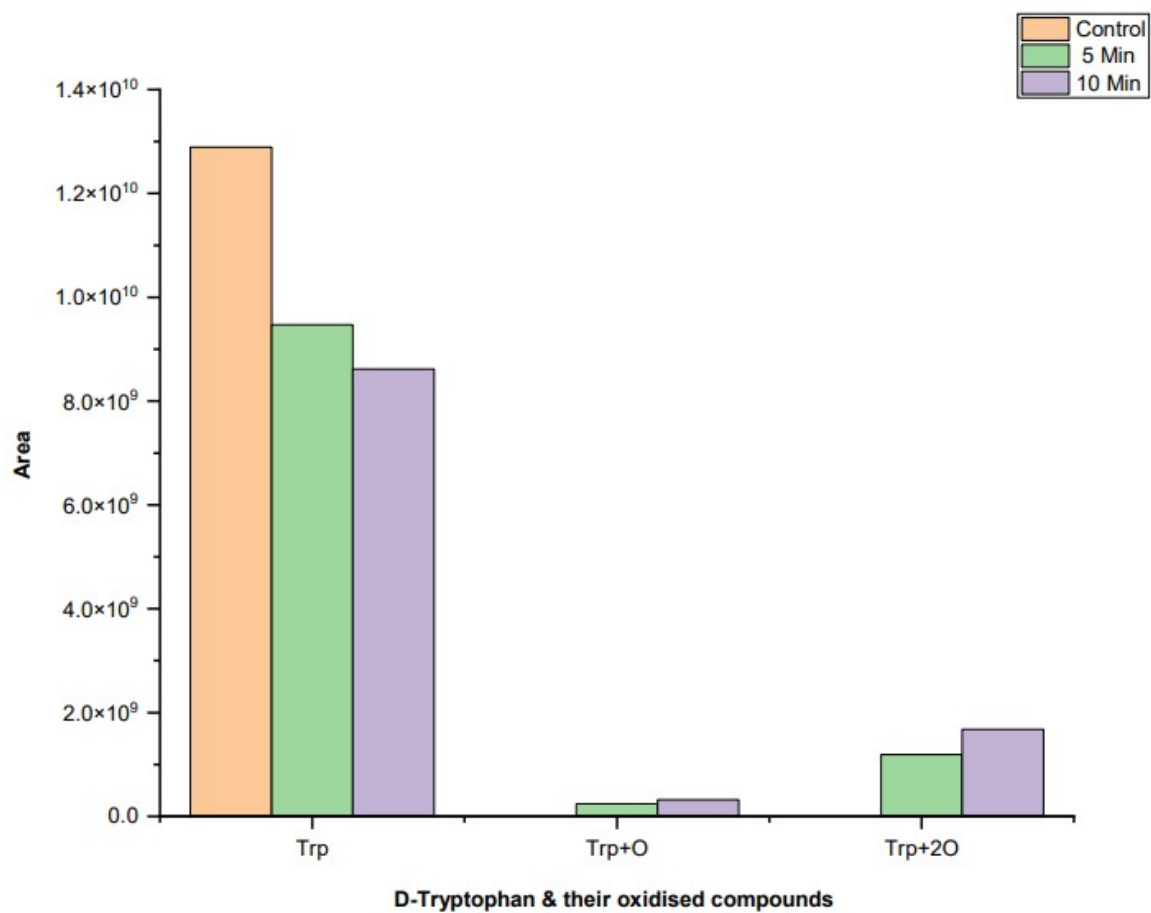

**Figure S4: Statistical representation of population of observed mass of D-Trp and its hydroxylated products after CAPP treatment.**
